# Supplementary material
Source: PubMed Central journal article supplement (PMC7189949)
Supplement: NIHMS1555323-supplement-2.pdf [file NIHMS1555323-supplement-2.pdf]

## SUPPLEMENTAL TABLES

**Supplementary Table S1.** Dosimetric parameters for radiation planning.

| Target Volume or Organ at Risk | Dose Constraint          |
|--------------------------------|--------------------------|
| PTV                            | V110(%) ≤ 10%            |
| Skin                           | V12Gy ≤ 50%              |
| 2cm longitudinal strip of skin | V12Gy ≤ 10%              |
| Long bones (femur, humerus)    | V30Gy ≤ 50%              |
| Femoral or humeral head        | V30Gy ≤ 5cc, Dmax ≤ 33Gy |
| Spinal coord                   | Dmax < 30Gy              |
| Chest wall                     | V30Gy ≤ 70cc             |
| Bowel                          | V32Gy ≤ 5cc              |
| Liver                          | V15Gy ≤ 700cc            |
| Kidney                         | V10Gy ≤ 10%              |

**Supplementary Table S2.** Association of clinical variables with wound toxicity using logistic regression.

|                                                 | Odds Ratio | Lower CI | Upper CI | pvalue |
|-------------------------------------------------|------------|----------|----------|--------|
| <b>Tumor Size</b>                               |            |          |          |        |
| (Intercept)                                     | 0.63       | 0.19     | 1.87     | 0.41   |
| Tumor Size: >10cm vs ≤5cm                       | 1.60       | 0.33     | 8.22     | 0.56   |
| Tumor Size: 5 to 10 cm vs ≤5cm                  | 0.40       | 0.09     | 1.79     | 0.23   |
| <b>Tumor site: lower extremity as reference</b> |            |          |          |        |
| (Intercept)                                     | 0.79       | 0.39     | 1.55     | 0.49   |
| Tumor site: Trunk/Girdle vs Lower Extremity     | 0.00       | NA       | >100000  | 0.99   |
| Tumor site: Upper vs Lower Extremity            | 0.16       | 0.01     | 1.00     | 0.10   |
| <b>Tumor site: Upper extremity as reference</b> |            |          |          |        |
| (Intercept)                                     | 0.13       | 0.01     | 0.68     | 0.05   |
| Tumor Site: Trunk/Girdle vs Upper Extremity     | 0.00       | NA       | >100000  | 0.99   |
| Tumor Site: Lower vs Upper Extremity            | 6.32       | 1.00     | 123.94   | 0.10   |
| <b>V12Gy (cc)</b>                               |            |          |          |        |
| (Intercept)                                     | 0.41       | 0.14     | 1.12     | 0.09   |
| V12Gy (cc)                                      | 1.00       | 1.00     | 1.01     | 0.73   |
| <b>D0.5cc (Gy)</b>                              |            |          |          |        |
| (Intercept)                                     | 0.03       | 0.00     | 6.27     | 0.23   |
| D0.5cc (Gy)                                     | 1.09       | 0.92     | 1.34     | 0.34   |
| <b>Tumor Depth</b>                              |            |          |          |        |
| (Intercept)                                     | 0.38       | 0.18     | 0.74     | 0.01   |
| Tumor Depth: Superficial vs Deep                | 2.64       | 0.62     | 11.32    | 0.18   |
| <b>Time from RT to surgery</b>                  |            |          |          |        |
| (Intercept)                                     | 0.36       | 0.05     | 2.71     | 0.32   |
| Time from RT to Surgery                         | 1.01       | 0.94     | 1.08     | 0.79   |

**Supplementary Table S3.** Association of tumor size and tumor site with wound toxicity using the likelihood ratio test. *Abbr: Df = degrees of freedom; Resid = residual; Dev = deviance*

| <b>Tumor Size</b>            | <b>Resid. Df</b> | <b>Resid. Dev</b> | <b>Df</b> | <b>Deviance</b> | <b>pvalue</b> |
|------------------------------|------------------|-------------------|-----------|-----------------|---------------|
| <b>Null Model</b>            | 47.00            | 58.98             | NA        | NA              | NA            |
| <b>Model with Tumor Size</b> | 49.00            | 62.69             | -2.00     | -3.71           | 0.16          |
| <b>Tumor site</b>            | <b>Resid. Df</b> | <b>Resid. Dev</b> | <b>Df</b> | <b>Deviance</b> | <b>pvalue</b> |
| <b>Null Model</b>            | 47.00            | 52.94             | NA        | NA              | NA            |
| <b>Model with Tumor Site</b> | 49.00            | 62.69             | -2.00     | -9.75           | 0.01          |

**Supplementary Table S4.** Top 20 germline single nucleotide polymorphisms in miRNA binding sites associated with wound toxicity.

| <b>Predictor name</b>       | <b>Rank [mean decrease in the Gini impurity]</b> |
|-----------------------------|--------------------------------------------------|
| <b>Lower extremity site</b> | 1                                                |
| <b>miR.99a.promoter</b>     | 2                                                |
| <b>IL1.B_rs4848306</b>      | 3                                                |
| <b>SHC4_rs1062124</b>       | 4                                                |
| <b>rs17599026</b>           | 5                                                |
| <b>RAC1_rs9374</b>          | 6                                                |
| <b>IL24_rs1150258</b>       | 7                                                |
| <b>IL1A_rs1800587</b>       | 8                                                |
| <b>ERCC1_rs3212948</b>      | 9                                                |
| <b>IL.6_rs12700386</b>      | 10                                               |
| <b>IL.6_rs2069840</b>       | 11                                               |
| <b>CAMK2G_rs2306327</b>     | 12                                               |
| <b>BMP2_rs1980499</b>       | 13                                               |
| <b>EREG_rs1460008</b>       | 14                                               |
| <b>CD274_rs4143815</b>      | 15                                               |
| <b>IL17D_rs7787</b>         | 16                                               |
| <b>STAT3_rs3744483</b>      | 17                                               |
| <b>BMP4_rs17563</b>         | 18                                               |
| <b>IRF5_rs10488631</b>      | 19                                               |
| <b>UNGC.41.IL1RAP</b>       | 20                                               |

**Supplementary Table S5.** Characteristics of 25 patients with matched pre- and post-RT ViewRayMRI available for analysis on a parallel MRI study. *Abbr.: MLS = Myxoid Liposarcoma.*

| <b>Patient No.</b> | <b>Histologic Subtype</b> | <b>Pre Vol (mm<sup>3</sup>)</b> | <b>Post Vol (mm<sup>3</sup>)</b> | <b>Change in Volume (cm<sup>3</sup>)</b> | <b>Time Interval (pre- vs post-treatment scan)</b> |
|--------------------|---------------------------|---------------------------------|----------------------------------|------------------------------------------|----------------------------------------------------|
| 1                  | Non-MLS                   | 31860.35                        | 46325.68                         | 14.47                                    | 17                                                 |
| 2                  | MLS                       | 230796.75                       | 167255.58                        | -63.54                                   | 17                                                 |
| 3                  | Non-MLS                   | 257019.04                       | 275390.63                        | 18.37                                    | 20                                                 |
| 4                  | Non-MLS                   | 248051.82                       | 196289.89                        | -51.76                                   | 17                                                 |
| 5                  | MLS                       | 51417.65                        | 29419.48                         | -22.00                                   | 17                                                 |
| 6                  | Non-MLS                   | 56058.53                        | 57612.30                         | 1.55                                     | 35                                                 |
| 7                  | Non-MLS                   | 45550.11                        | 41175.01                         | -4.38                                    | 28                                                 |
| 8                  | Non-MLS                   | 5601.76                         | 11039.97                         | 5.44                                     | 24                                                 |
| 9                  | Non-MLS                   | 32424.81                        | 50722.54                         | 18.30                                    | 21                                                 |
| 10                 | Non-MLS                   | 139471.65                       | 327887.18                        | 188.42                                   | 17                                                 |
| 11                 | Non-MLS                   | 102221.97                       | 59411.41                         | -42.81                                   | 17                                                 |
| 12                 | MLS                       | 276326.42                       | 209227.92                        | -67.10                                   | 17                                                 |
| 13                 | Non-MLS                   | 324676.51                       | 347290.04                        | 22.61                                    | 16                                                 |
| 14                 | Non-MLS                   | 5806.21                         | 7196.43                          | 1.39                                     | 24                                                 |
| 15                 | MLS                       | 220717.67                       | 138285.88                        | -82.43                                   | 17                                                 |
| 16                 | Non-MLS                   | 250457.76                       | 307342.53                        | 56.88                                    | 17                                                 |
| 17                 | Non-MLS                   | 131069.00                       | 175576.45                        | 44.51                                    | 25                                                 |
| 18                 | MLS                       | 553961.28                       | 561116.81                        | 7.16                                     | 21                                                 |
| 19                 | Non-MLS                   | 14065.74                        | 4293.32                          | -9.77                                    | 28                                                 |
| 20                 | Non-MLS                   | 1060424.80                      | 1032928.47                       | -27.50                                   | 24                                                 |
| 21                 | Non-MLS                   | 53588.87                        | 72937.01                         | 19.35                                    | 22                                                 |
| 22                 | MLS                       | 68018.50                        | 36575.02                         | -31.44                                   | 17                                                 |
| 23                 | Non-MLS                   | 197296.14                       | 272399.90                        | 75.10                                    | 17                                                 |
| 24                 | Non-MLS                   | 190971.08                       | 227586.98                        | 36.62                                    | 29                                                 |
| 25                 | Non-MLS                   | 577574.55                       | 619403.78                        | 41.83                                    | 28                                                 |
