# Supplementary material
Source: PubMed Central journal article supplement (PMC7189949)

**Figure S1 – CONSORT diagram**

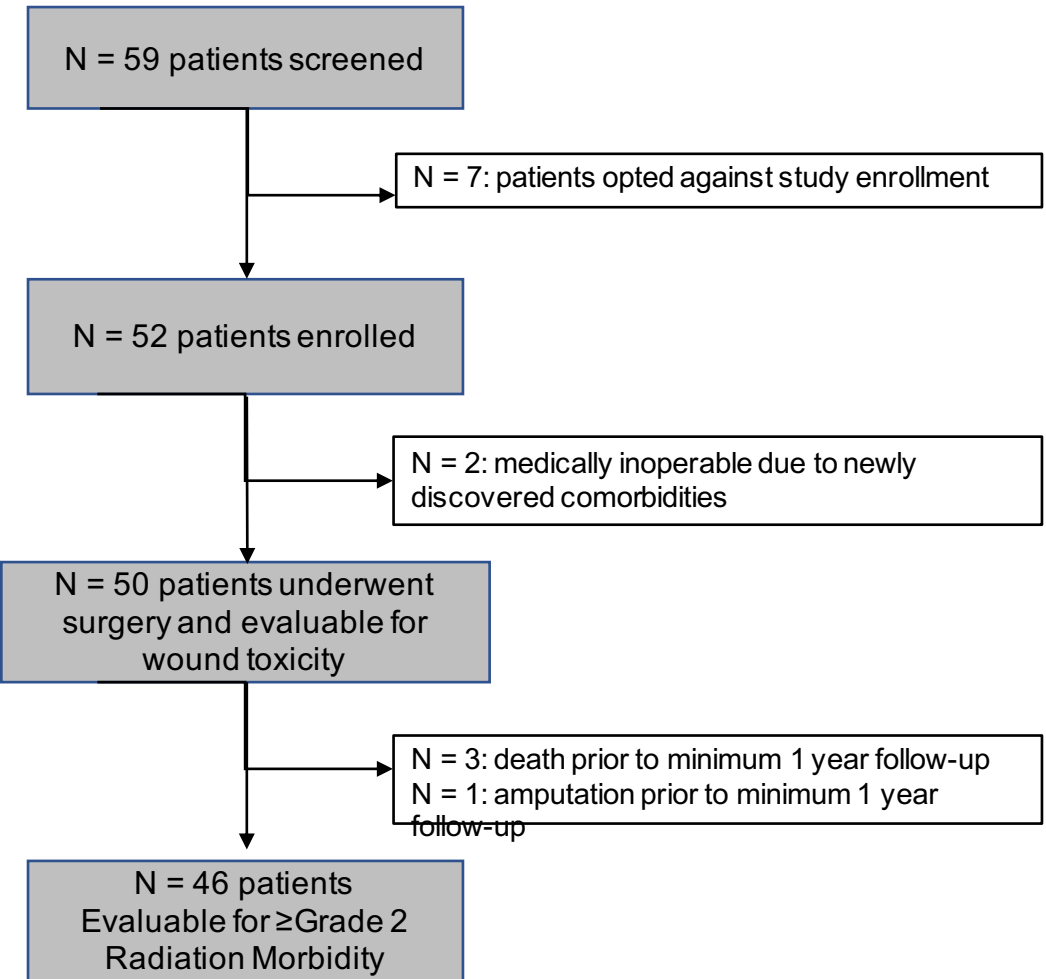

Supplement: NIHMS1555323-supplement-3.pdf [file NIHMS1555323-supplement-3.pdf]

A

MSTS Score

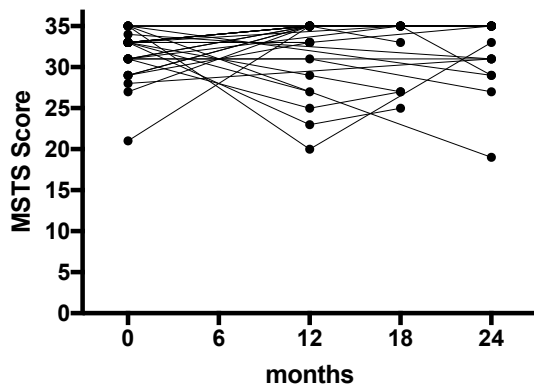

B

TESS

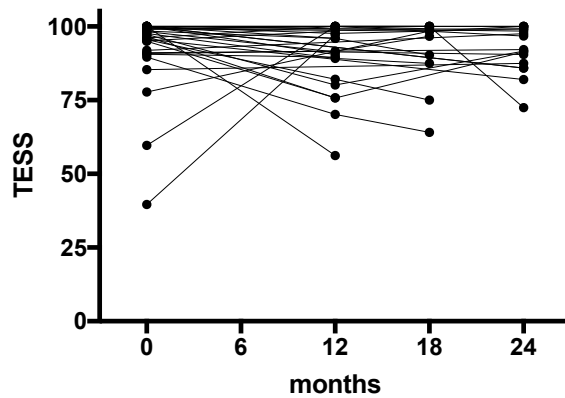

MSTS Score

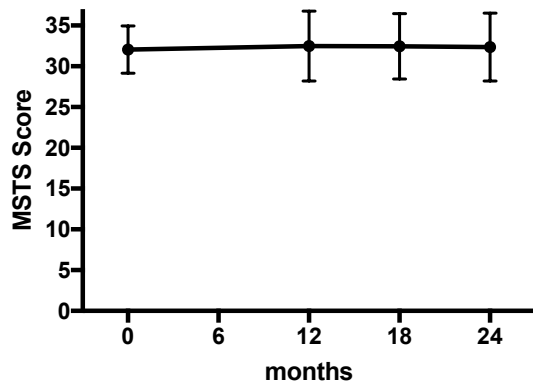

TESS

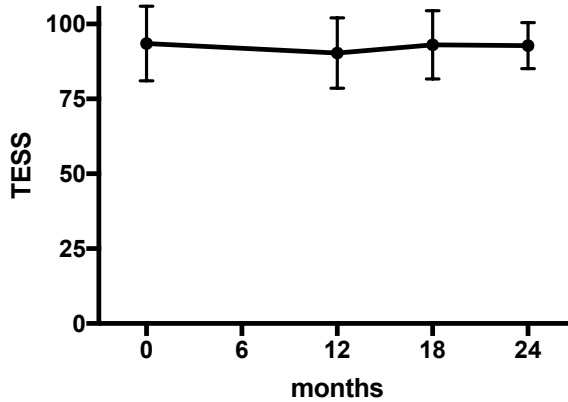

Supplement: NIHMS1555323-supplement-4.pdf [file NIHMS1555323-supplement-4.pdf]

**Figure S3**

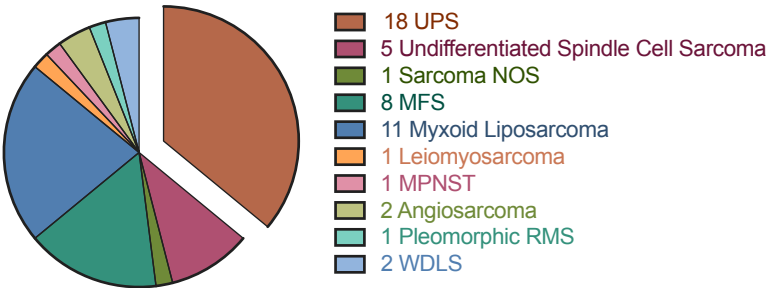

**Total=50**

Supplement: NIHMS1555323-supplement-5.pdf [file NIHMS1555323-supplement-5.pdf]

Figure S4

A

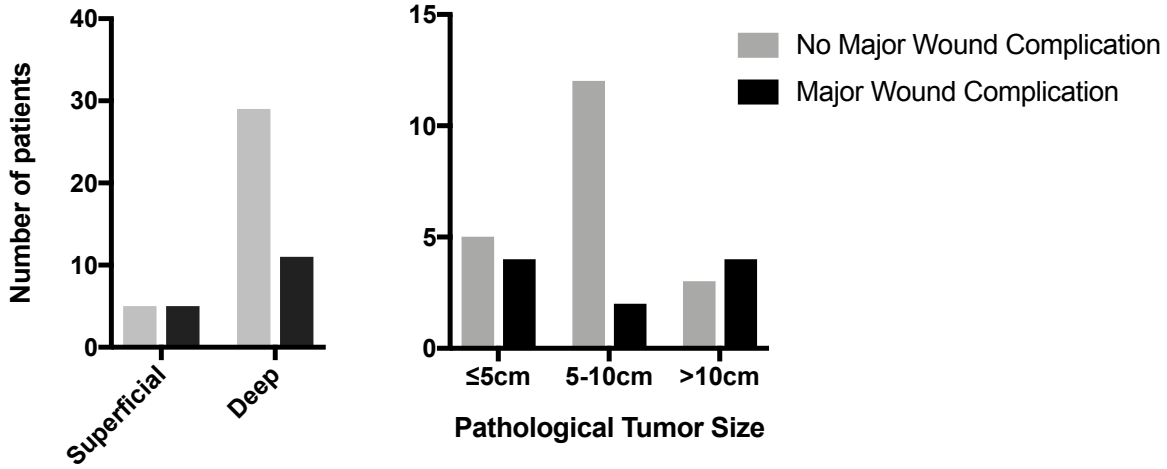

B

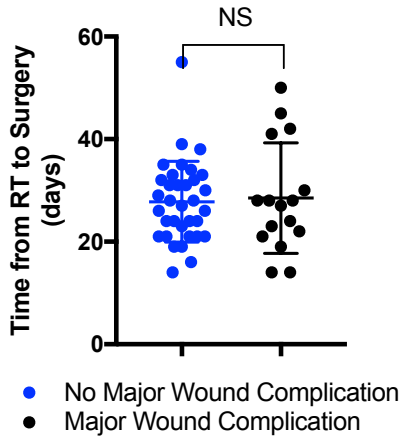

C

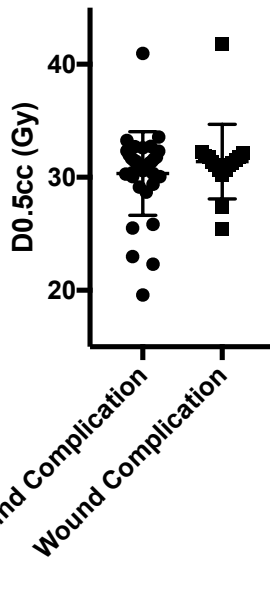

D

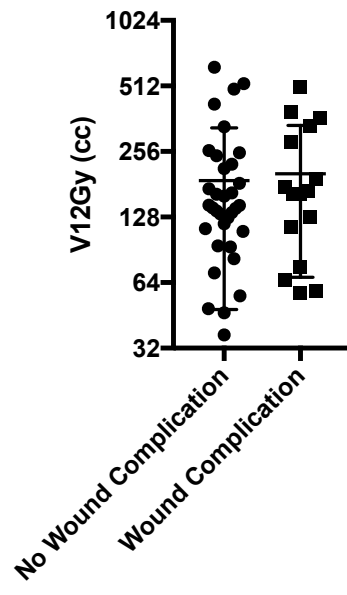

Supplement: NIHMS1555323-supplement-6.pdf [file NIHMS1555323-supplement-6.pdf]
